# Supplementary material
Source: Springer Nature journal article supplement (https://www.springermedizin.de/resource/supplementary/12916_2011_380_MOESM1_ESM.pdf/9599832)

**INDIRECT EFFECTS**

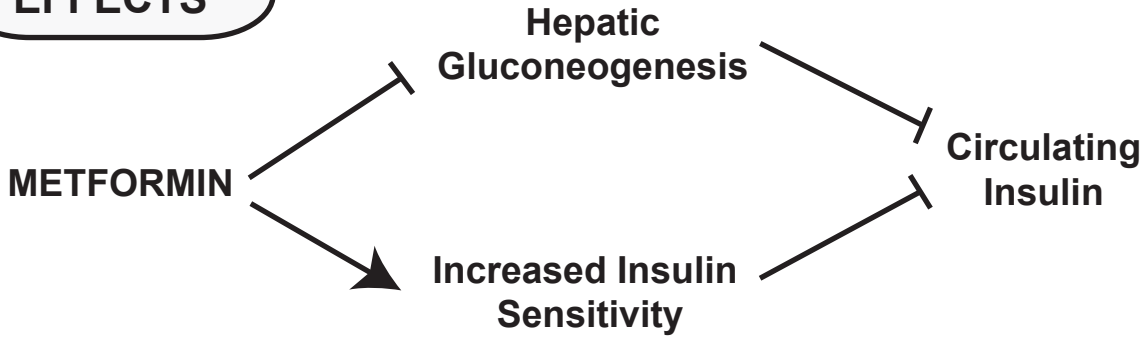

**DIRECT EFFECTS**

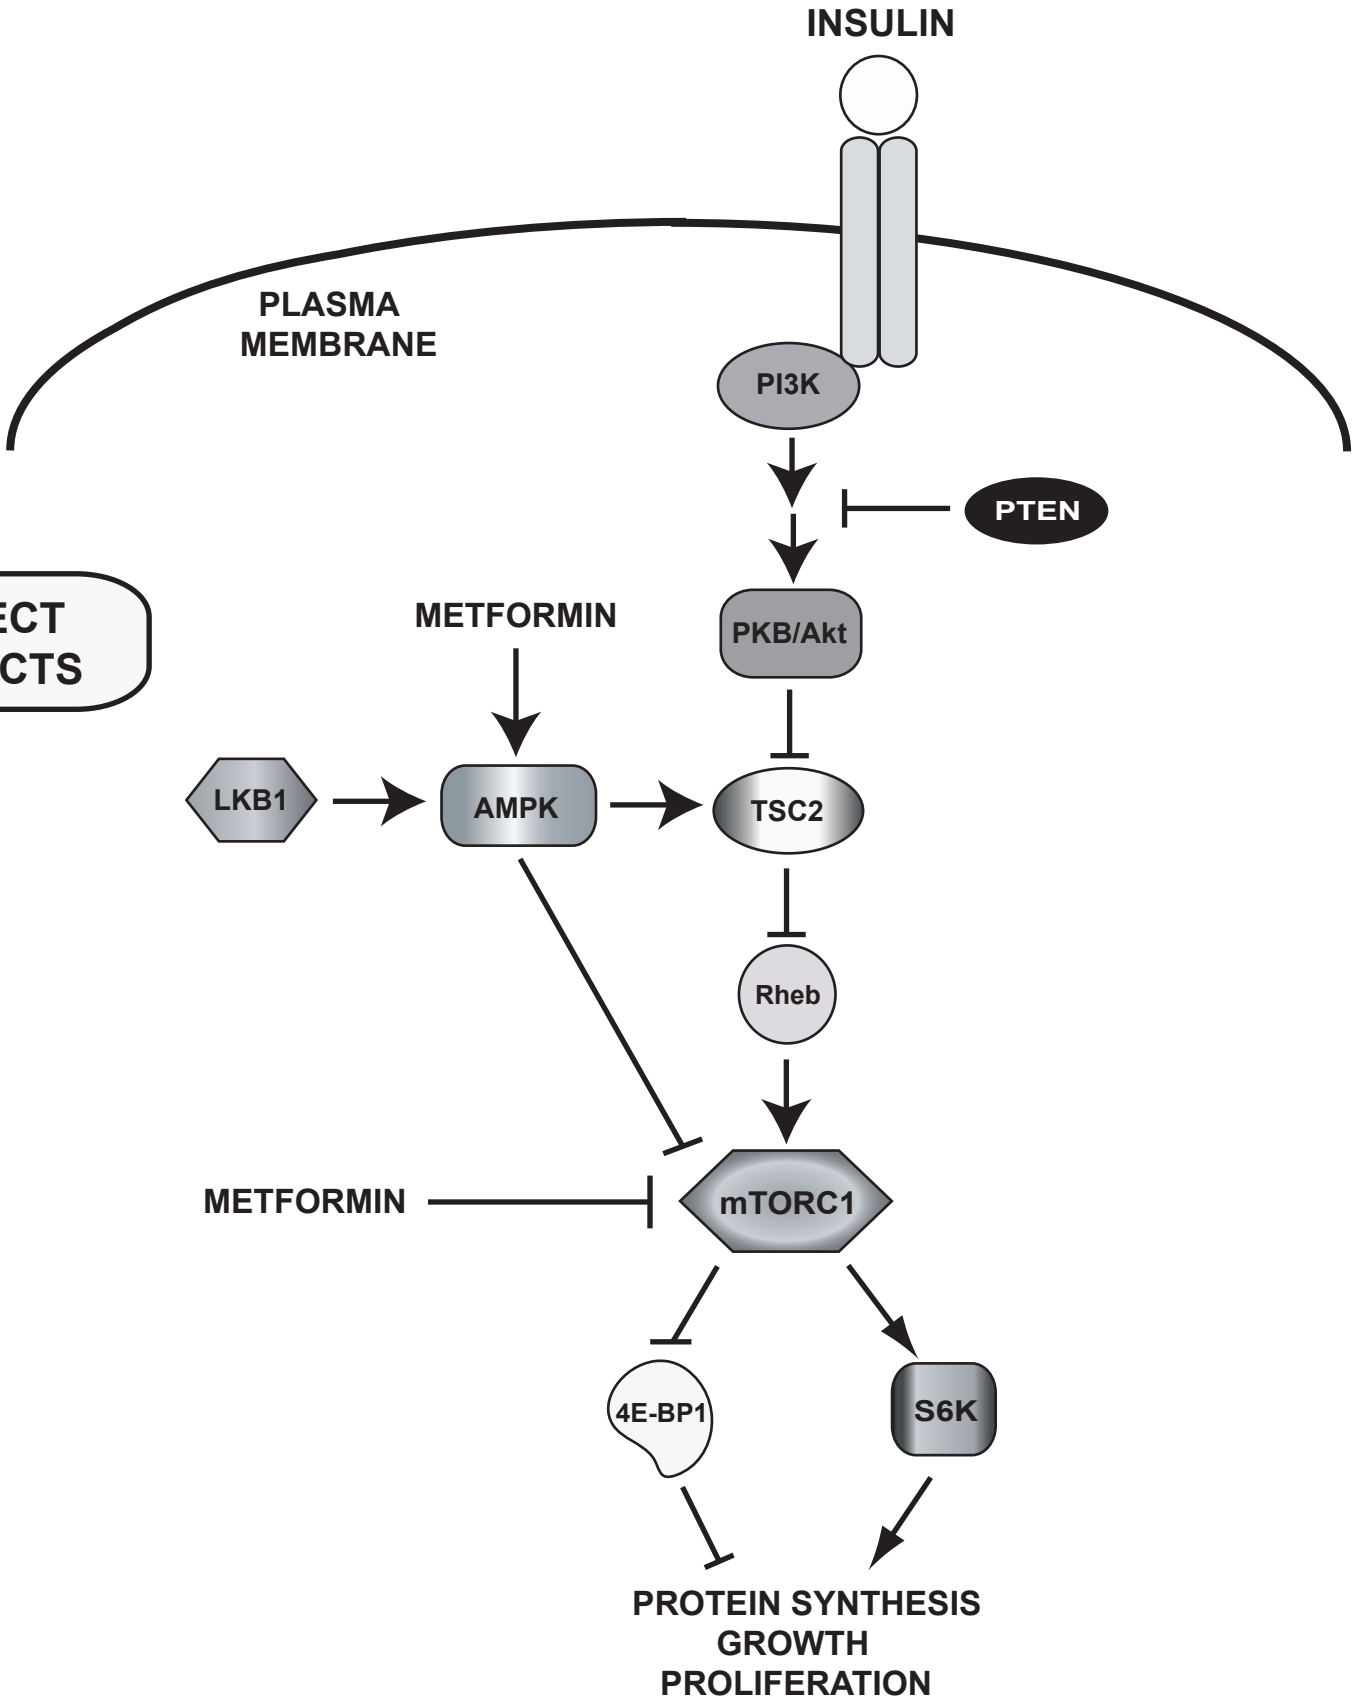

Supplement: MOESM1 [file 9599832]
